# Supplementary material
Source: PubMed Central journal article supplement (PMC1187946)
Supplement: 7600763s1.pdf [file 7600763s1.pdf]

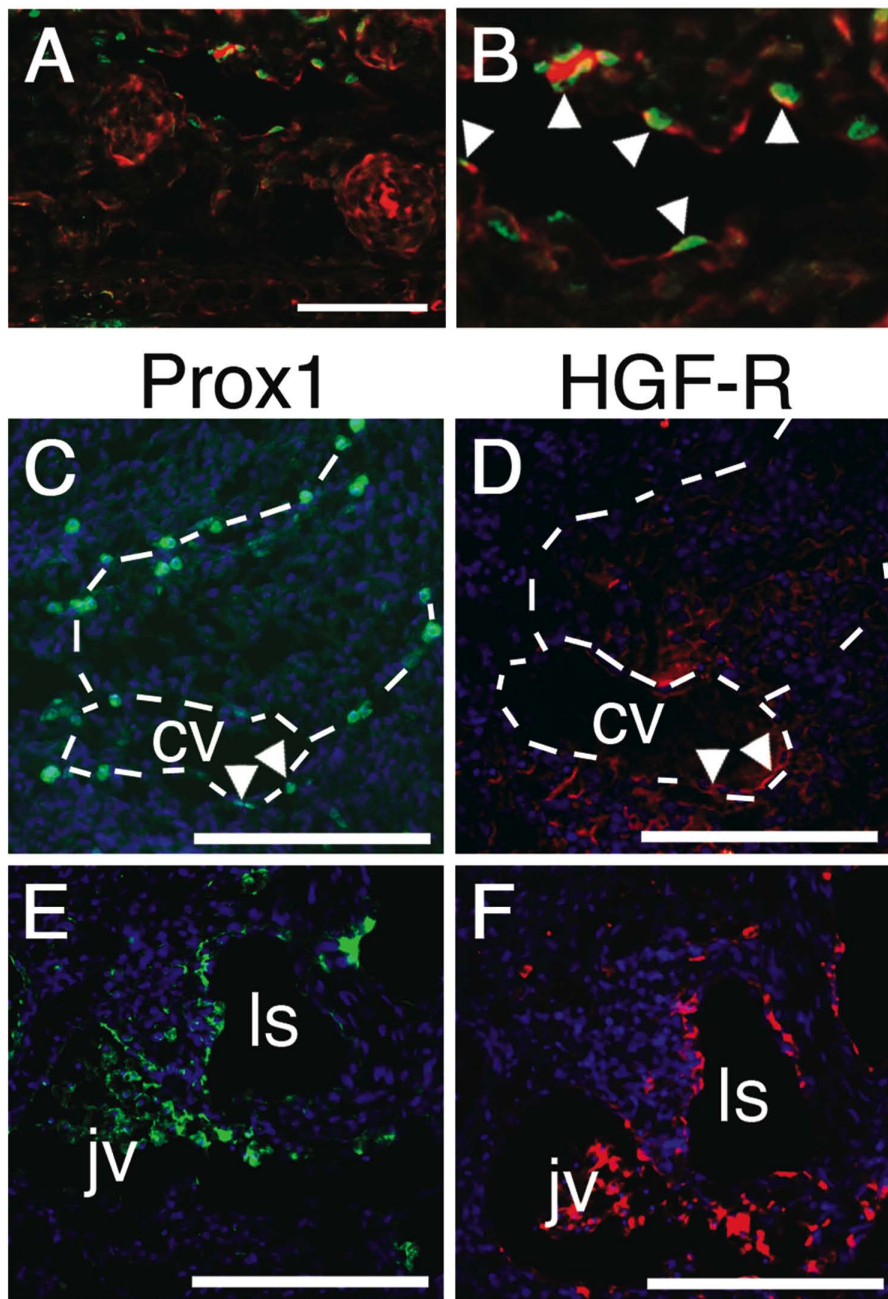

**Supplemental Data 1:**

**HGF-R is expressed by Prox1-positive lymphatic endothelial cells in skin inflammation and during embryonic development.**

(A,B) Double immunofluorescence stains of inflamed skin (day 7 of DTH reaction; see also Fig. 2) for the lymphatic-specific transcription factor Prox1 (green) and HGF-R (red) confirmed that Prox1-positive lymphatic endothelial cells (arrowheads in B) of enlarged lymphatic vessels also expressed HGF-R. Panel B shows a higher magnification of an enlarged lymphatic vessel. (C-F) Serial sections of mouse embryonic tissues at stages E 12.5 (C,D) and E14.5 (E,F) were stained for Prox1 (C,E) and HGF-R (D,F). (C,D) At E12.5, endothelial cells that were budding off from the cardinal vein (CV) and a few of the CV endothelial cells expressed Prox1 and HGF-R was also found at this time point (arrowheads). In contrast, at E14.5, HGF-R was expressed by many Prox1 positive lymphatic endothelial cells of the lymph sacs (ls) and the jugular vein (jv). Scale Bars: 100  $\mu$ m.
