# Supplementary material
Source: PubMed Central journal article supplement (PMC1187946)
Supplement: 7600763s2.pdf [file 7600763s2.pdf]

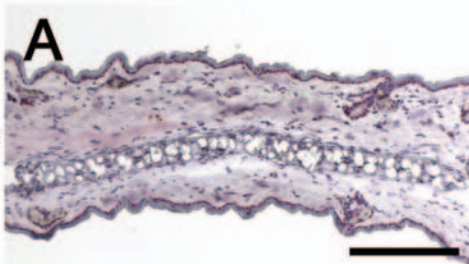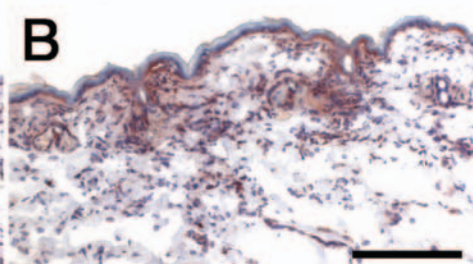

Control-IgG

anti-HGF-R

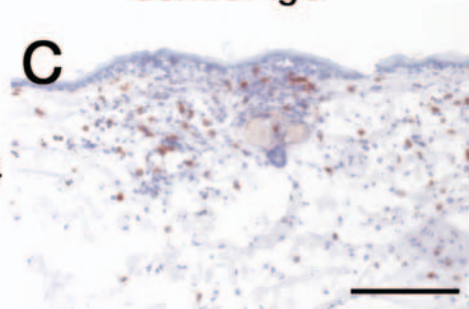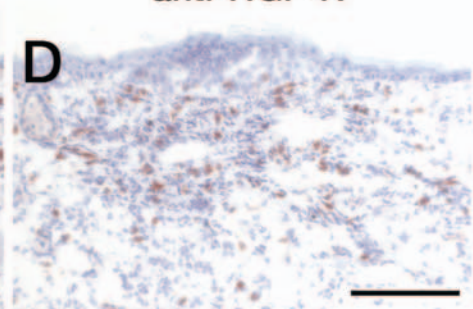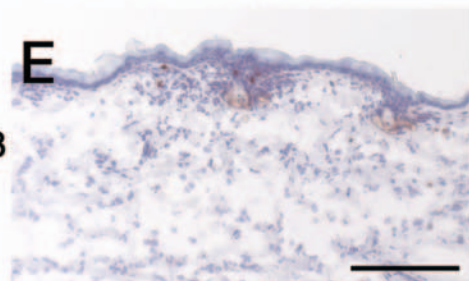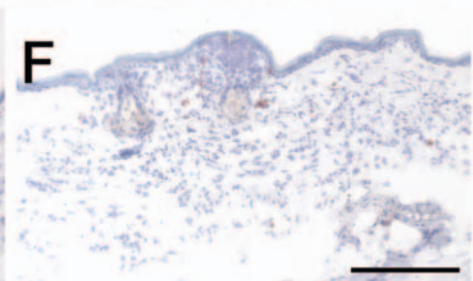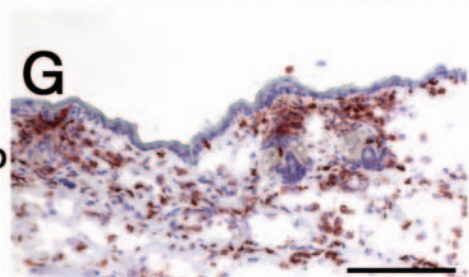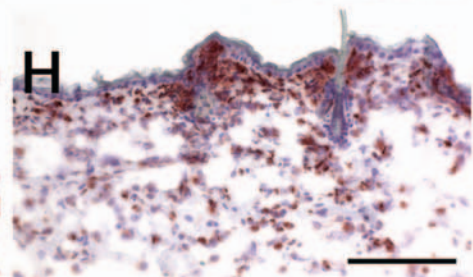

CD11b

**Supplemental data 2. Upregulation of HGF expression in cutaneous inflammation.**

(A, B) Immunohistochemistry for HGF showed upregulation of HGF expression in the ear skin at 24 hours after induction of inflammation (B,) as compared with normal ear skin (A). (C-H) Immunohistochemistry for CD4 (C,D), CD8 (E,F), and CD11b (G,H) at 24 h after induction of inflammation. No major differences of the number of infiltrating CD4- positive, CD8-positive, or CD11-positive cells were found in mice treated with a blocking anti-HGF-R antibody (D,F,H), as compared with the control IgG-treated group (C,E,G).
